# Supplementary material
Source: Research Square preprint supplement (doi:10.21203/rs.3.rs-9834848/v1)
Supplement: Supplementary file 1 [file aab584dfbfa2faac1ad98a9d.docx]

**Supplementary Materials**

**Supplementary Table 1.** Accession numbers, host, geographic origin and strain information of *L.* sequences included in the phylogenetic analysis.

| **GenBank Accession number** | **Species** | **Host** | **Origin** | **Strain/Isolate** | **Reference** |
| --- | --- | --- | --- | --- | --- |
| JX945645 | *L. infantum* | Dog | Italy | _ | (Kostygov et al., 2021) |
| MW930738 | *L. infantum* | Human | Italy | L. infantum strain LAU72 | (Iatta et al., 2021) |
| AJ000289 | *L. infantum* | Human | Tunisia | MHOM/TN/80/IPT1. | (Kuhls et al., 2005) |
| AJ634345 | *L. infantum* | Human | China | MHOM/CN/54/Peking | (Kuhls et al., 2005) |
| AJ634361 | *L. infantum* | Human | Sudan | MHOM/SD/62/3S | (Kuhls et al., 2005) |
| AB558241 | *L. mexicana* | Human | Ecuador | _ | (Kato et al., 2011) |
| HG512933 | *L. amazonensis* | Culture | Colombia | MHOM/CO/82/CELIS | (Van Der Auwera et al., 2014) |
| MT940889 | *L. amazonensis* | Human | Brazil | MHOM/BR/2008/UB017 | (Coser et al., 2021) |
| HM130599 | *Leishmania (Sauroleishamnia)* sp. | Human | China | MHOM/GS6/CHN/SCgq | (Yang et al., 2010) |
| HM130600 | *Leishmania (Sauroleishamnia)* sp*.* | Dog | China | MCAN/CN/60/GS1 | (Yang et al., 2010) |
| HM130601 | *Leishmania (Sauroleishamnia)* sp. | Human | China | MHOM/CN/90/SC10H2 | (Yang et al., 2010) |
| KJ420585 | *L. tropica* | Human | Afghanistan | _ | Unpublished |
| KU194925 | *L. tropica* | lizard | Xinjiang, China | _ | (Zhang et al., 2016) |
| LC086293 | *L. tarentolae* | *S. minuta* | Spain | _ | (Bravo-Barriga et al., 2016) |
| MW832546.1 | *L. tarentolae* | Dog | Italy | _ | (Mendoza-Roldan et al., 2024) |
| MW930736.1 | *L. tarentolae* | Human | Italy | L. tarentolae strain LIU50 | (Iatta et al., 2021) |
| ON036087 | *L. tropica* | Cat | Israel | _ | (Baneth et al., 2022) |
| PQ686310 | *L. tarentolae* | Lab culture | Italy | *L. tarentolae* strain P10 | (Alvaro et al., 2025) |
| FJ416613 | *Trypanosoma evansi* | Buffalo | China | _ | (Unpublished data) |

**References for Supplementary Table 1:**

1. Alvaro, A., Cattaneo, G. M., Bigoni, F., Sanchez-Ruiz, L., Mendoza-Roldan, J. A., Otranto, D., Varotto-Boccazzi, I., Gabrieli, P., Bandi, C., & Epis, S. (2025). Sand Fly Fauna and Prevalence of L. spp. in a Newly Investigated Area of Northern Italy: Emerging Epidemiological Scenarios? Transboundary and Emerging Diseases, 2025(1), 4426385. https://doi.org/10.1155/tbed/4426385
2. Baneth, G., Nachum-Biala, Y., Adamsky, O., & Gunther, I. (2022). L. tropica and L. infantum infection in Dogs and cats in central Israel. Parasites & Vectors, 15(1). https://doi.org/10.1186/s13071-022-05272-0
3. Bravo-Barriga, D., Parreira, R., Maia, C., Blanco-Ciudad, J., Afonso, M. O., Frontera, E., Campino, L., Pérez-Martín, J. E., Serrano Aguilera, F. J., & Reina, D. (2016). First molecular detection of L. tarentolae-like DNA in Sergentomyia minuta in Spain. Parasitology Research, 115(3), 1339–1344. https://doi.org/10.1007/s00436-015-4887-z
4. Coser, E. M., Ferreira, B. A., Yamashiro-Kanashiro, E. H., Lindoso, J. A. L., & Coelho, A. C. (2021). Susceptibility to paromomycin in clinical isolates and reference strains of L. species responsible for tegumentary L.sis in Brazil. Acta Tropica, 215. https://doi.org/10.1016/j.actatropica.2020.105806
5. Iatta, R., Mendoza-Roldan, J. A., Latrofa, M. S., Cascio, A., Brianti, E., Pombi, M., Gabrielli, S., & Otranto, D. (2021). L. tarentolae and L. infantum in humans, Dogs and cats in the Pelagie archipelago, southern Italy. PLoS Neglected Tropical Diseases, 15(9). https://doi.org/10.1371/journal.pntd.0009817
6. Kato, H., Watanabe, J., Nieto, I. M., Korenaga, M., & Hashiguchi, Y. (2011). L. species identification using FTA card sampling directly from patients’ cutaneous lesions in the state of Lara, Venezuela. Transactions of the Royal Society of Tropical Medicine and Hygiene, 105(10), 561–567. https://doi.org/10.1016/J.TRSTMH.2011.05.009
7. Kostygov, A. Y., Karnkowska, A., Votýpka, J., Tashyreva, D., Maciszewski, K., Yurchenko, V., & Lukeš, J. (2021). Euglenozoa: Taxonomy, diversity and ecology, symbioses and viruses. Open Biology, 11(3). https://doi.org/10.1098/rsob.200407
8. Kuhls, K., Mauricio, I. L., Pratlong, F., Presber, W., & Schönian, G. (2005). Analysis of ribosomal DNA internal transcribed spacer sequences of the L. donovani complex. Microbes and Infection, 7(11–12), 1224–1234. https://doi.org/10.1016/J.MICINF.2005.04.009
9. Mendoza-Roldan, J. A., Varotto-Boccazzi, I., Louzada-Flores, V. N., Evans, A., Cheikhi, I. B., Carbonara, M., Zatelli, A., Epis, S., Bandi, C., Beugnet, F., & Otranto, D. (2024). Saurian-associated L. tarentolae in Dogs: Infectivity and immunogenicity evaluation in the canine model. PLOS Pathogens, 20(10), e1012598. https://doi.org/10.1371/journal.ppat.1012598
10. Van Der Auwera, G., Ravel, C., Verweij, J. J., Bart, A., Schon̈ian, G., & Felger, I. (2014). Evaluation of four single-locus markers for L. species discrimination by sequencing. Journal of Clinical Microbiology, 52(4), 1098–1104. https://doi.org/10.1128/JCM.02936-13
11. Yang, B. Bin, Guo, X. G., Hu, X. S., Zhang, J. G., Liao, L., Chen, D. L., & Chen, J. P. (2010). Species discrimination and phylogenetic inference of 17 Chinese L. isolates based on internal transcribed spacer 1 (ITS1) sequences. Parasitology Research, 107(5), 1049–1065. https://doi.org/10.1007/s00436-010-1969-9
12. Zhang, J. R., Guo, X. G., Liu, J. L., Zhou, T. H., Gong, X., Chen, D. L., & Chen, J. P. (2016). Molecular detection, identification and phylogenetic inference of L. spp. in some desert lizards from Northwest China by using internal transcribed spacer 1 (ITS1) sequences. Acta Tropica, 162, 83–94. https://doi.org/10.1016/j.actatropica.2016.06.023
